# Supplementary material for: Microwave-assisted synthesis and in vitro and in silico studies of pyrano[3,2-c]quinoline-3-carboxylates as dual acting anti-cancer and anti-microbial agents and potential topoisomerase II and DNA-gyrase inhibitors
Source: Royal Society of Chemistry journal article supplement (doi:10.1039/d4ra06201a), 2025-01-01
Supplement: d4ra06201a1.pdf [file d4ra06201a1.pdf]

## Microwave assisted synthesis, *in vitro* and *in silico* studies of pyrano[3,2-c]quinoline-3-carboxylates as dual acting anti-cancer and anti-microbial agents as potential topoisomerase II and DNA-gyrase inhibitors

Ashraf A Aly,<sup>1\*</sup> Hisham A. Abd El-Naby,<sup>1</sup> Essam Kh. Ahmed,<sup>1</sup> Sageda A. Gedamy,<sup>1</sup> Kari Rissanen,<sup>2</sup> Martin Nieger,<sup>3</sup> Michael G. Shehat,<sup>4</sup> Marwa M. Shaaban,<sup>5</sup> Amal Atta<sup>5</sup>

<sup>1</sup>Chemistry Department, Faculty of Science, Minia University, 61519 El-Minia, Egypt, e-mails: A. A. Aly, [ashrafaly63@yahoo.com](mailto:ashrafaly63@yahoo.com) ([ashraf.shehata@mu.edu.eg](mailto:ashraf.shehata@mu.edu.eg)); H.A. Abd El-Naby, [hisham\\_minia@mu.edu.eg](mailto:hisham_minia@mu.edu.eg); E.K. Ahmed, [essam.mohd@mu.edu.eg](mailto:essam.mohd@mu.edu.eg); S. A. Gedamy, [sagedaali332@yahoo.com](mailto:sagedaali332@yahoo.com)

<sup>2</sup> Department of Chemistry, University of Jyväskylä, P.O. Box 35, FIN-40014 Jyväskylä, Finland, K. Rissanen, e-mail: [kari.t.rissanen@jyu.fi](mailto:kari.t.rissanen@jyu.fi)

<sup>3</sup> Department of Chemistry, University of Helsinki, P.O. Box 55, A. I. Virtasen aukio I, 00014 Helsinki, Finland, K. Rissanen, M. Nieger, e-mail: [martin.nieger@helsinki.fi](mailto:martin.nieger@helsinki.fi)

<sup>4</sup>Department of Microbiology, Faculty of Pharmacy, Alexandria University, Alexandria 21521, Egypt, Michael G. Shehat, e-mail: [michael.shehat@alexu.edu.eg](mailto:michael.shehat@alexu.edu.eg)

<sup>5</sup> Department of Pharmaceutical Chemistry, Faculty of Pharmacy, Alexandria University, Alexandria 21521, Egypt, M. M. Shaaban, e-mail: [maraw.mamdouh@alexu.edu.eg](mailto:maraw.mamdouh@alexu.edu.eg); A. Atta, e-mail: [amal.atta@alexu.edu.eg](mailto:amal.atta@alexu.edu.eg) ([missalex\\_pharma@yahoo.com](mailto:missalex_pharma@yahoo.com))

\*To whom correspondence should be addressed: **Prof Ashraf A. Aly, Ph.D.** Chemistry Department, Faculty of Science, Minia University, 61519, El-Minia, Egypt; e-mail address: [ashrafaly63@yahoo.com](mailto:ashrafaly63@yahoo.com) ([ashraf.shehata@mu.edu.eg](mailto:ashraf.shehata@mu.edu.eg)).

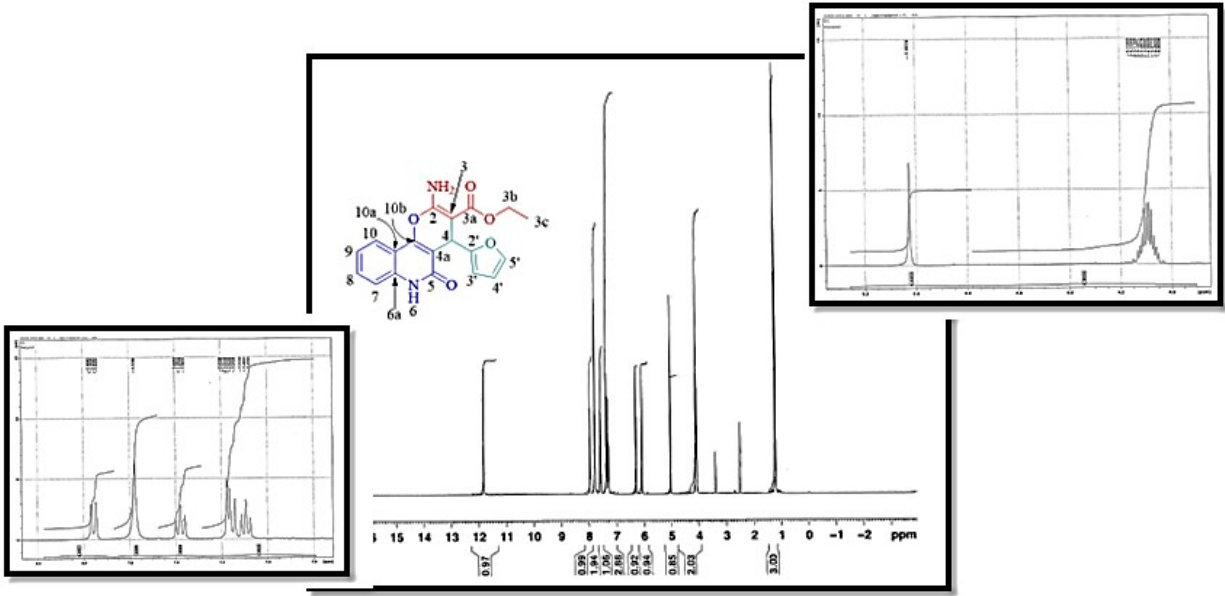

SI Figure 1. <sup>1</sup>H NMR spectrum of compound 3a

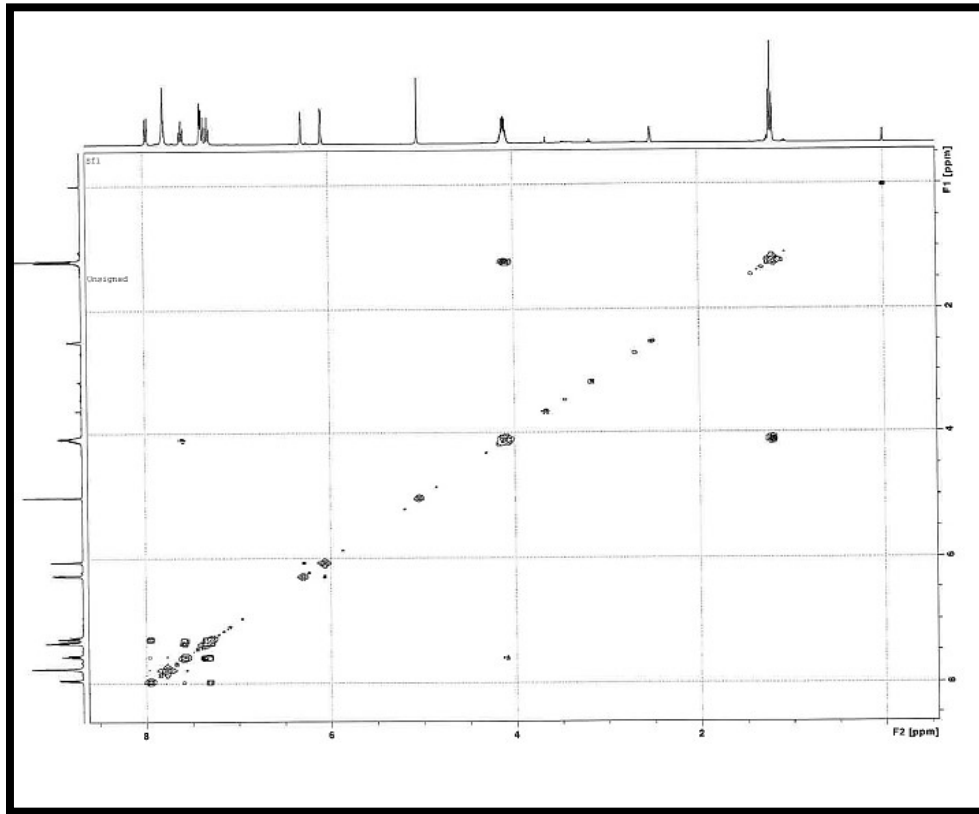

SI Figure 2. <sup>1</sup>H -<sup>1</sup>H- COSY NMR of compound 3a

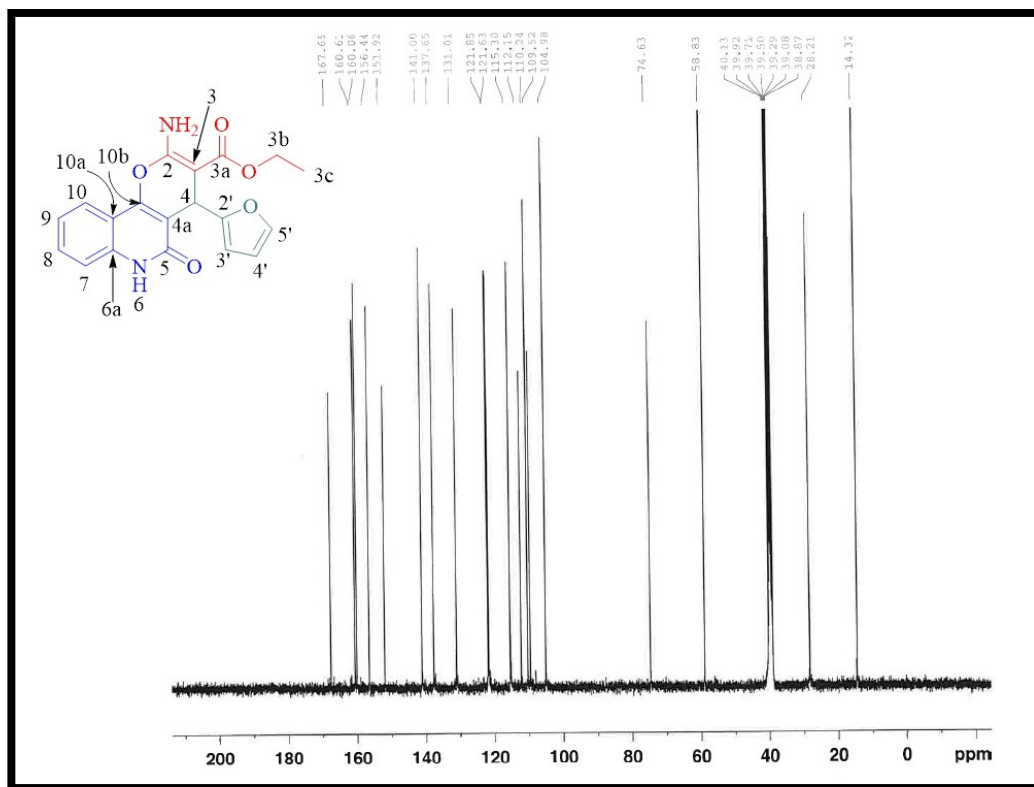

SI Figure 3. <sup>13</sup>C NMR spectrum of compound 3a

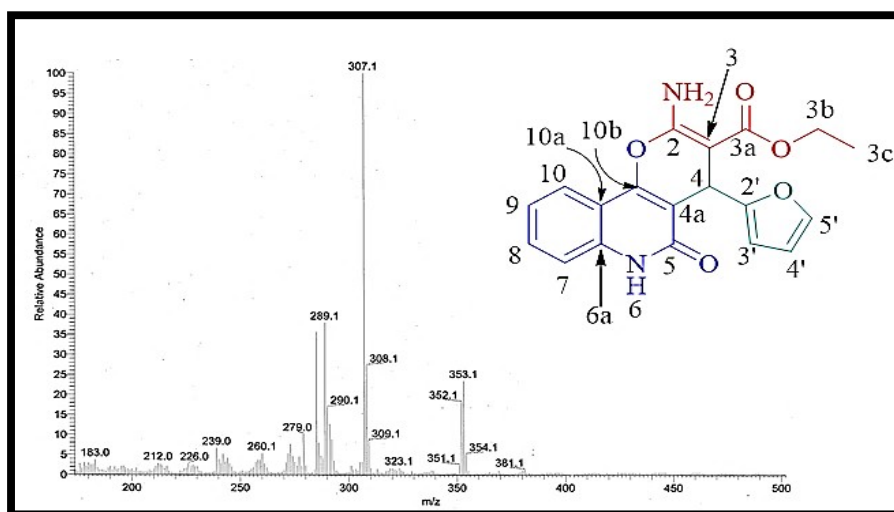

SI Figure 4. Mass spectroscopy of compound 3a

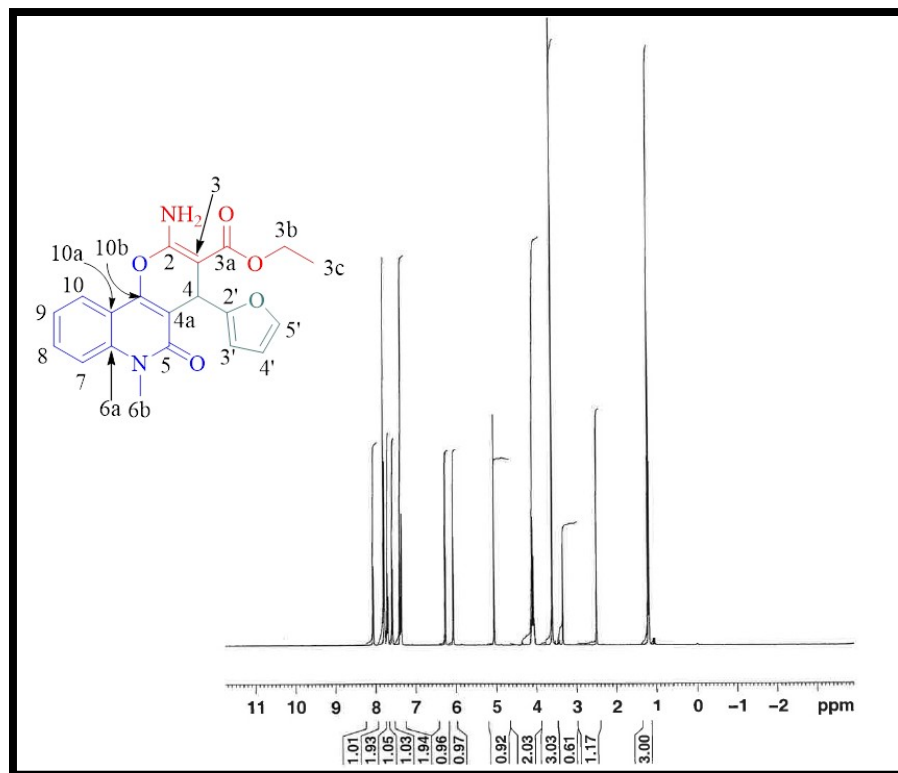

SI Figure 5. <sup>1</sup>H NMR spectrum of compound 3b

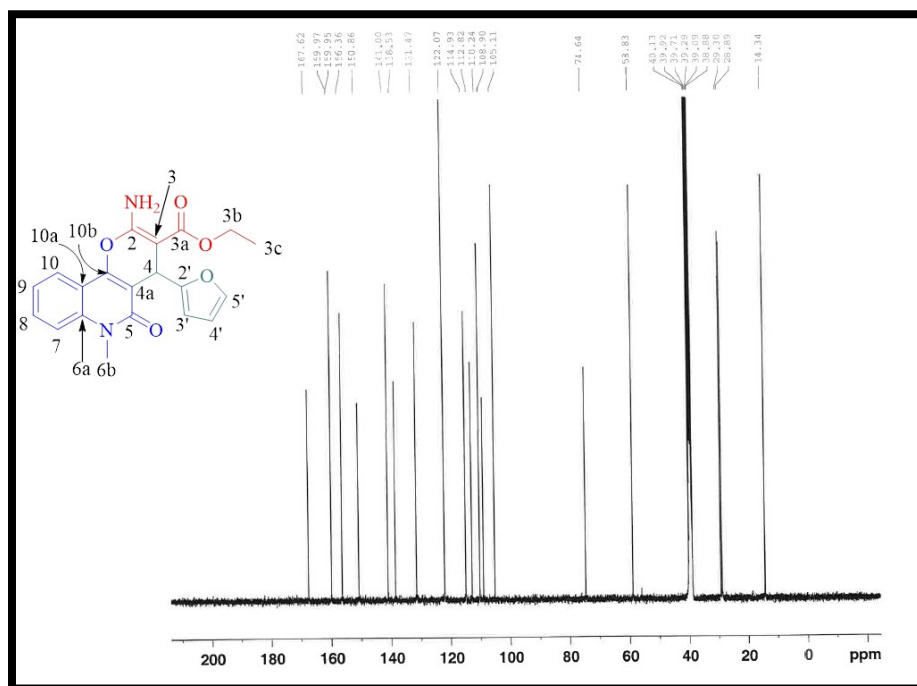

SI Figure 6. <sup>13</sup>C NMR spectrum of compound 3b

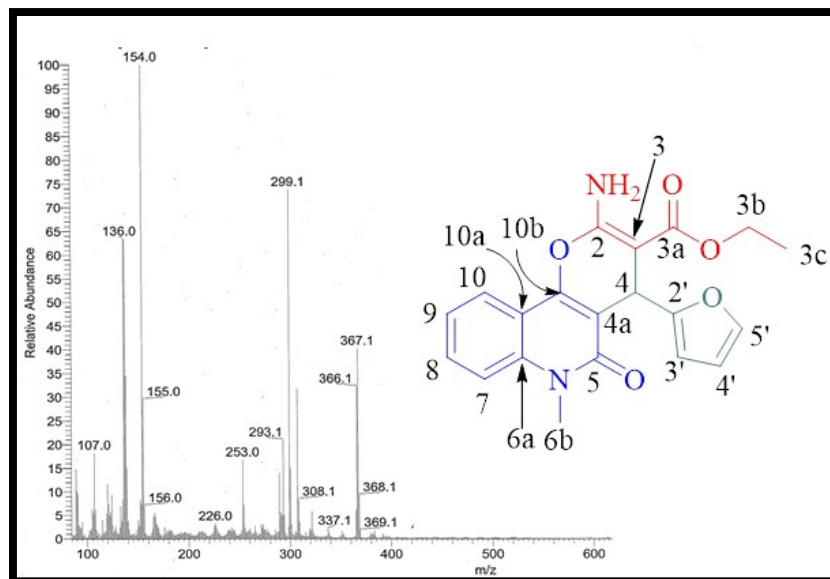

**SI Figure 7.** Mass spectrum of compound **3b**

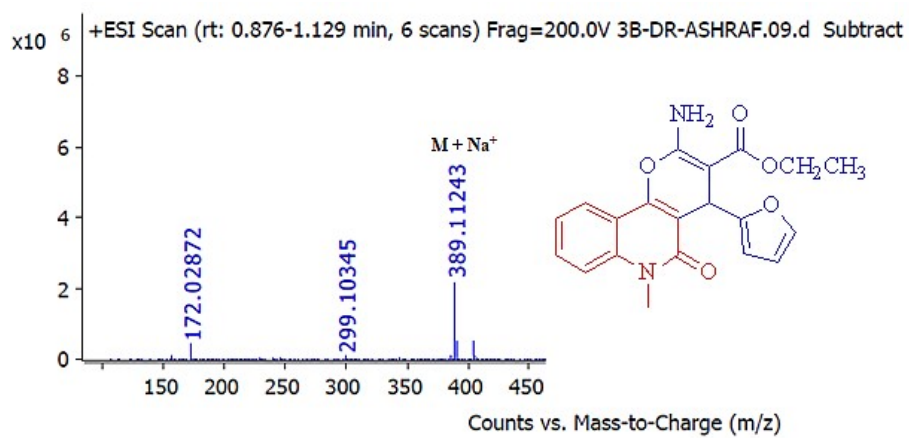

**SI Figure 8.** HRMS spectroscopy of compound **3b**

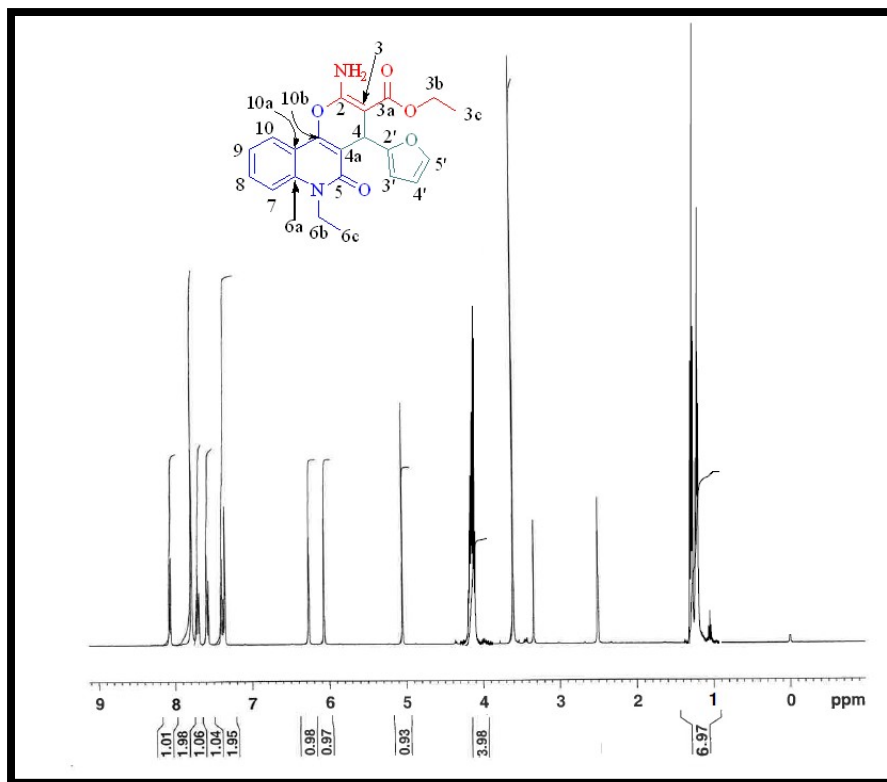

SI Figure 9. <sup>1</sup>H NMR spectrum of compound 3c

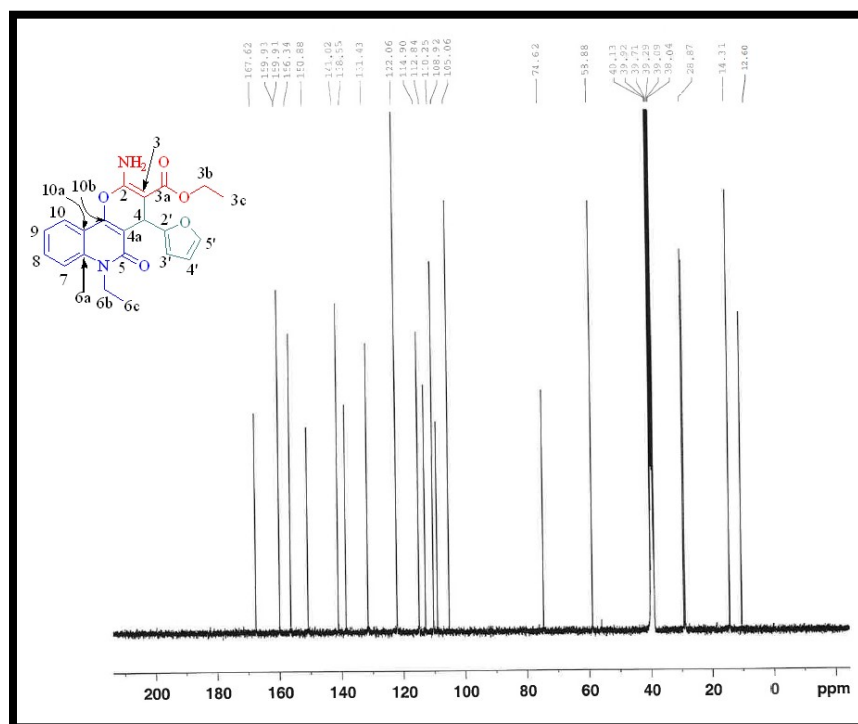

SI Figure 10. <sup>13</sup>C NMR spectrum of compound 3c

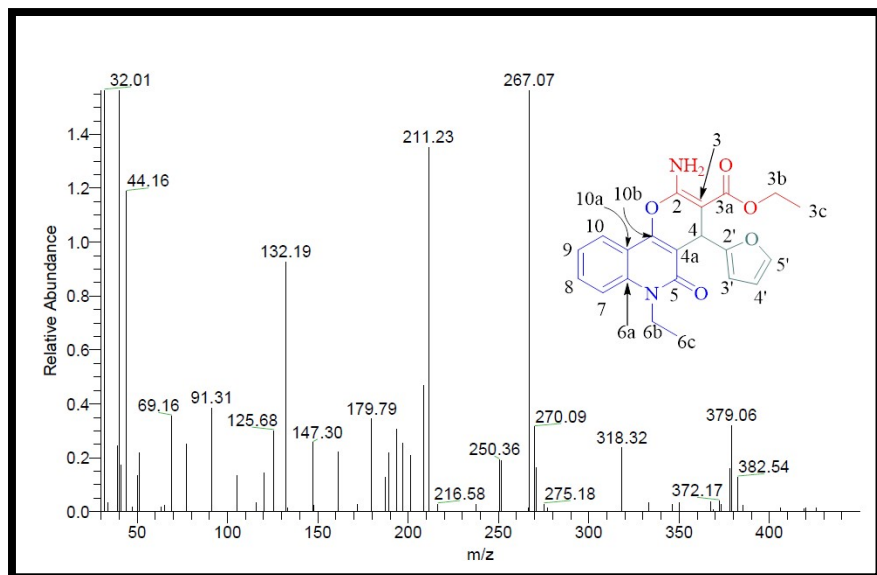

SI Figure 11. Mass spectrum of compound 3c

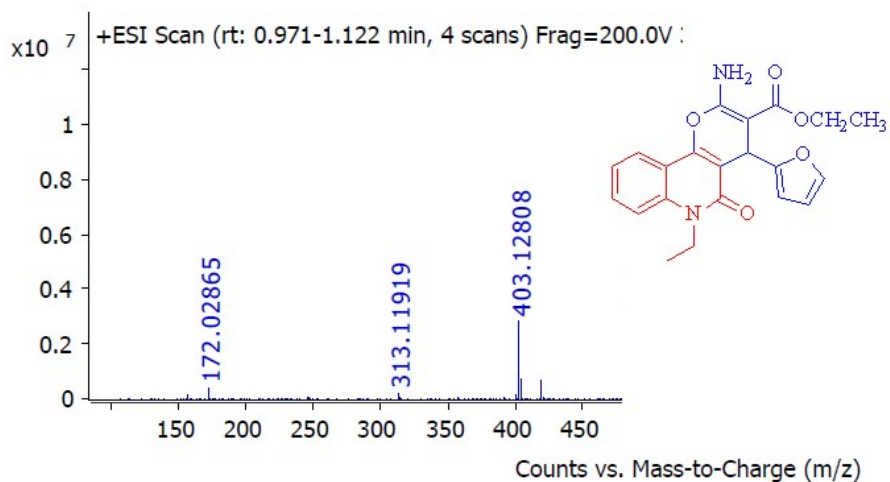

SI Figure 12. HRMS of spectroscopy of compound 3c

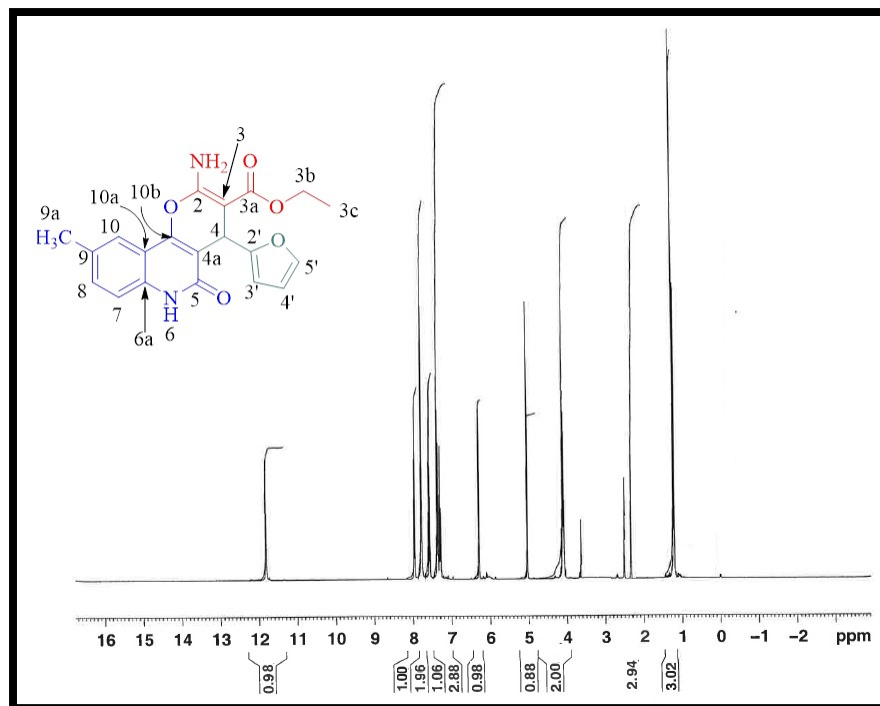

SI Figure 13. <sup>1</sup>H NMR spectrum of compound 3d

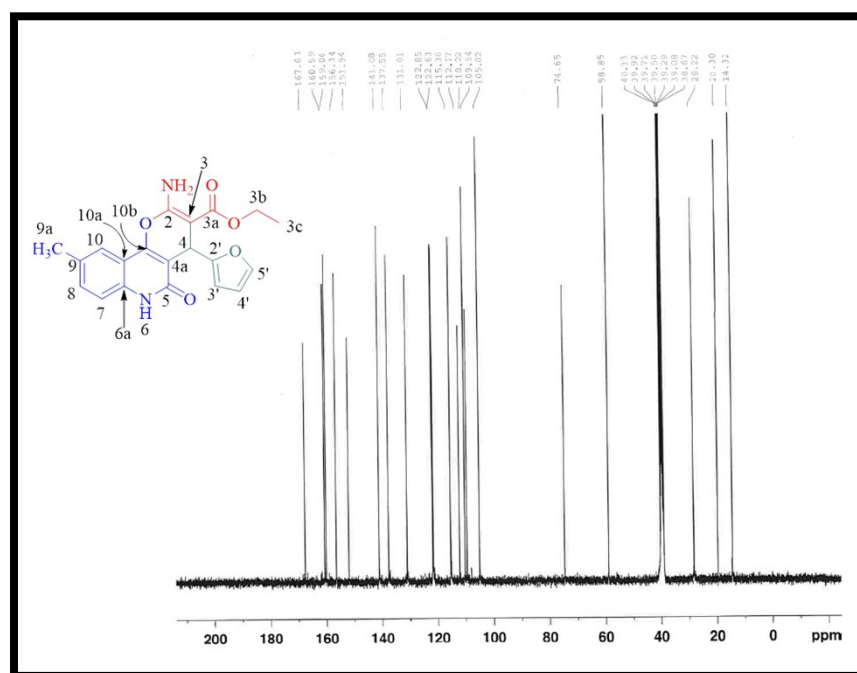

SI Figure 14. <sup>13</sup>C NMR spectrum of compound 3d



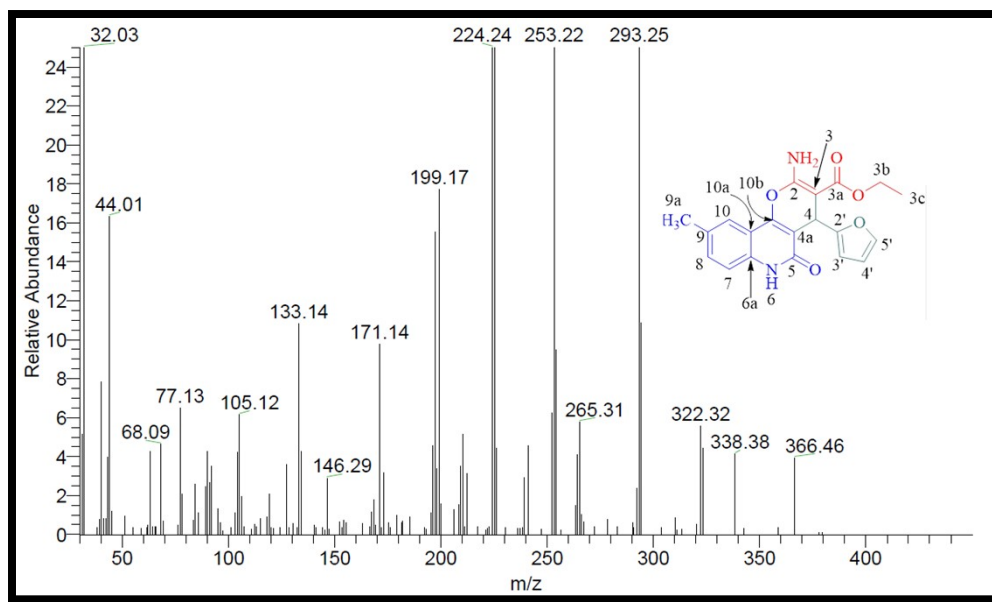

SI Figure 15. Mass spectrum of compound 3d

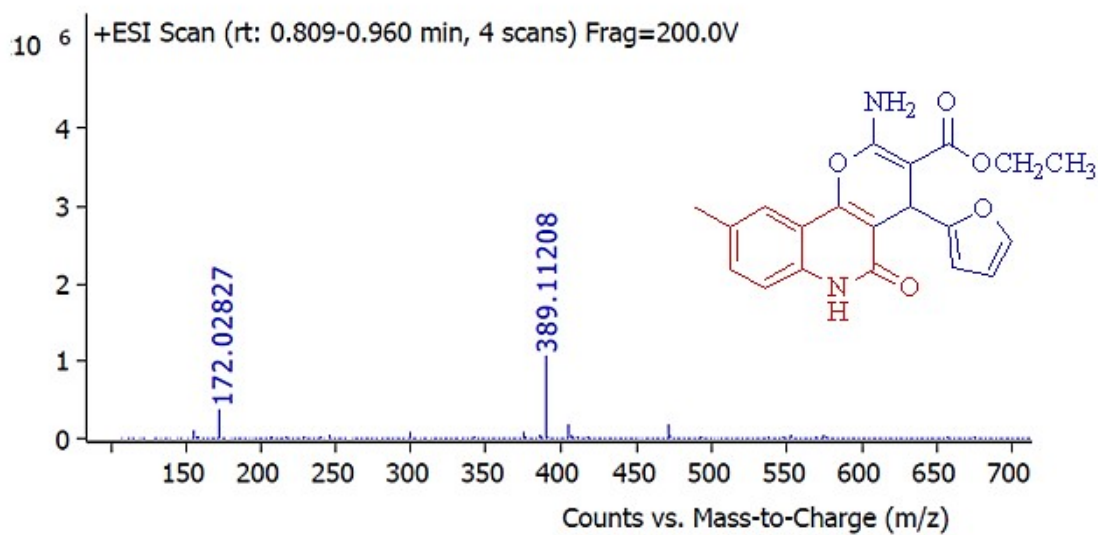

SI Figure 16. HRMS spectroscopy of compound 3d

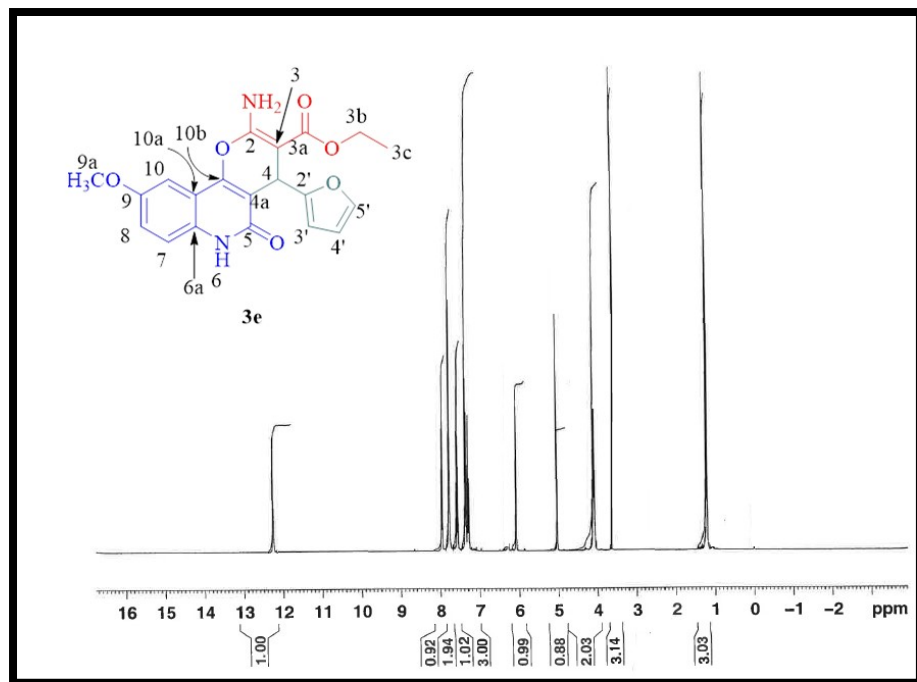

SI Figure 17. <sup>1</sup>H NMR spectrum of compound 3e

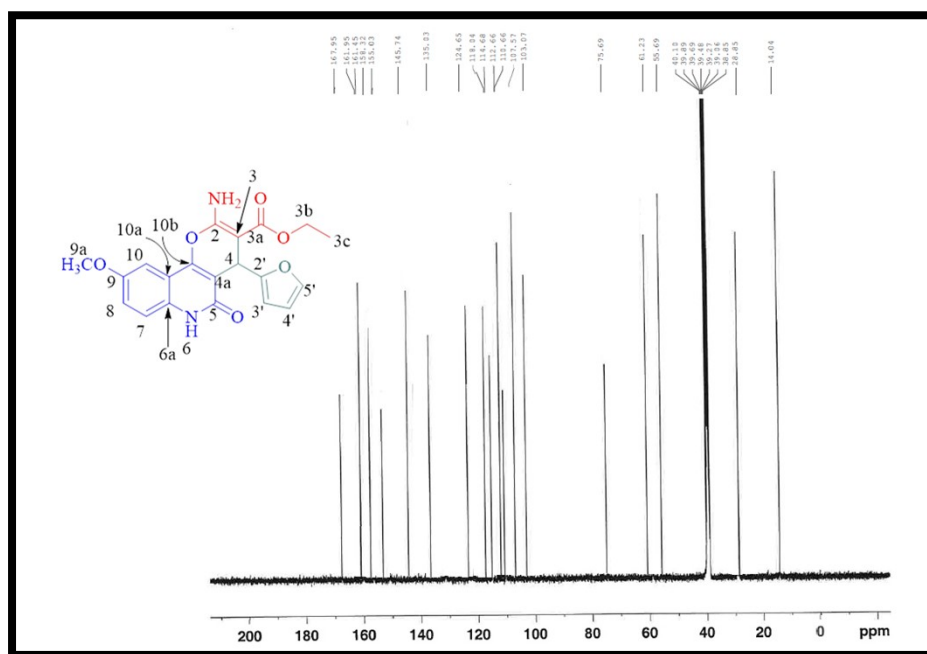

SI Figure 18. <sup>13</sup>C NMR spectrum of compound 3e

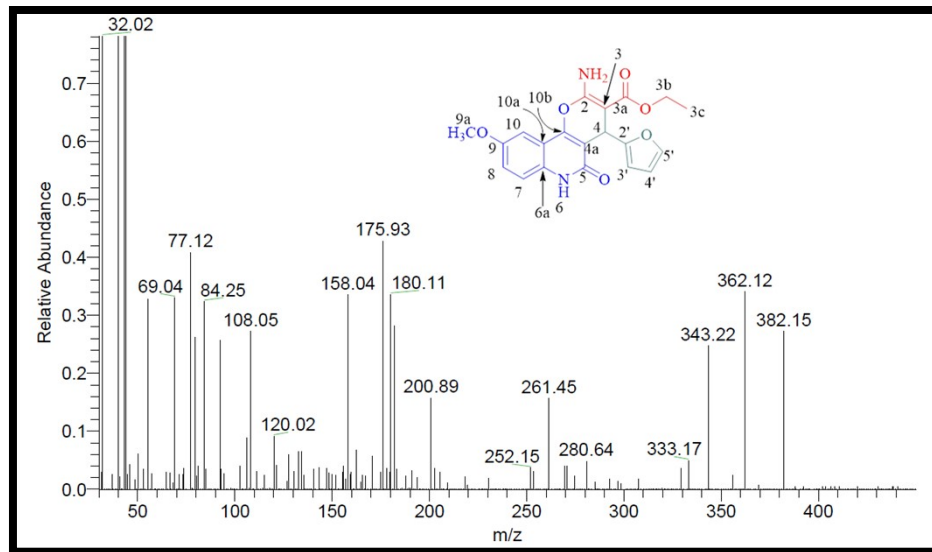

SI Figure 19. Mass spectrum of compound 3e.

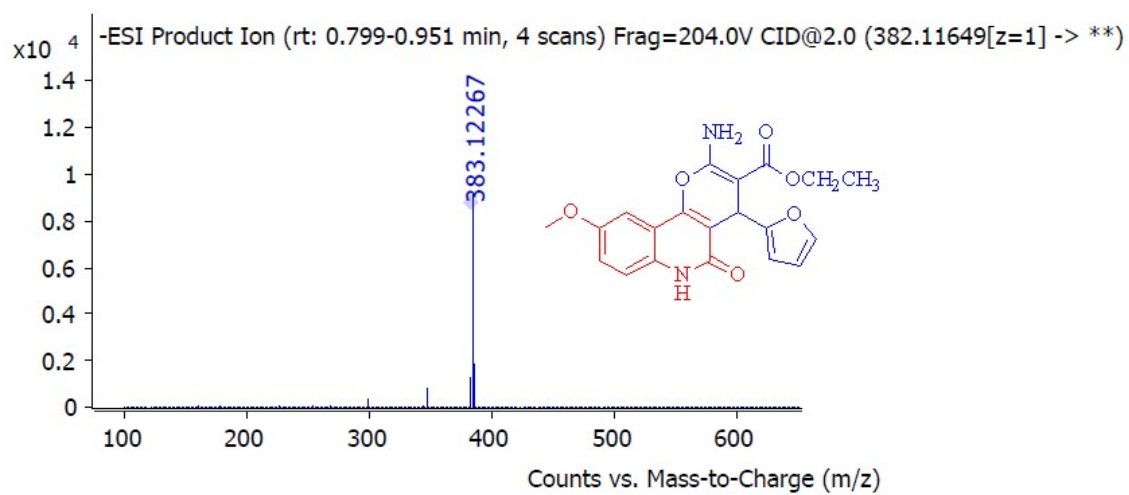

SI Figure 20. HRMS spectroscopy of compound 3e.

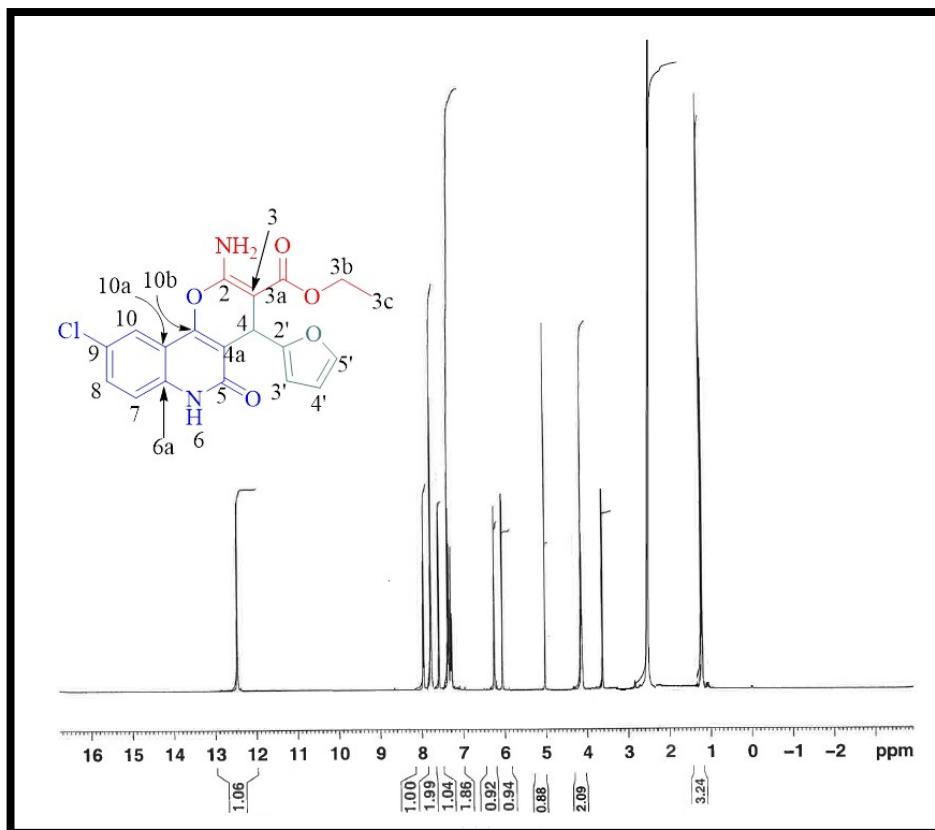

SI Figure 21. <sup>1</sup>H NMR spectrum of compound 3f

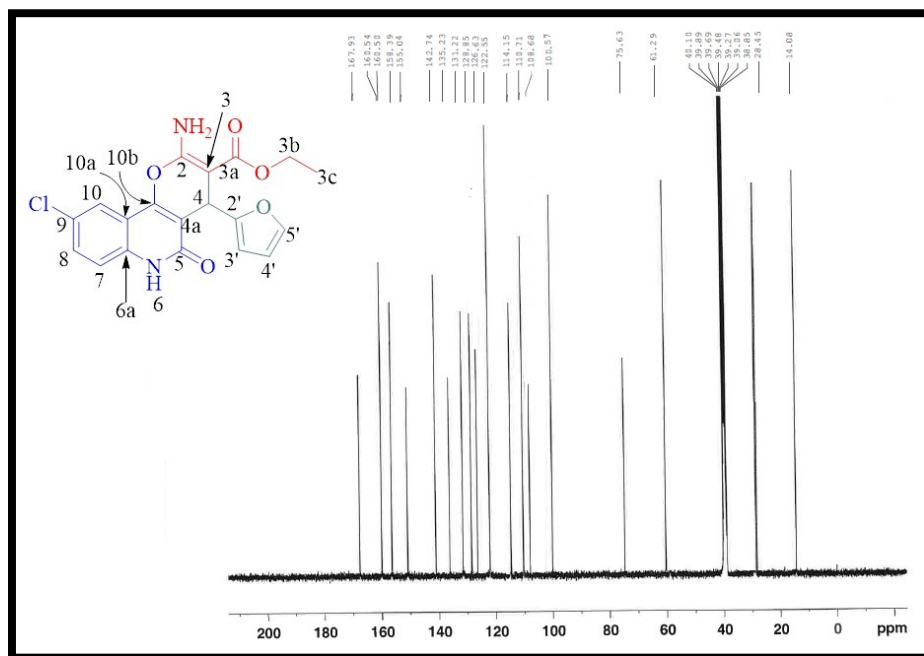

SI Figure 22. <sup>13</sup>C NMR spectrum of compound 3f

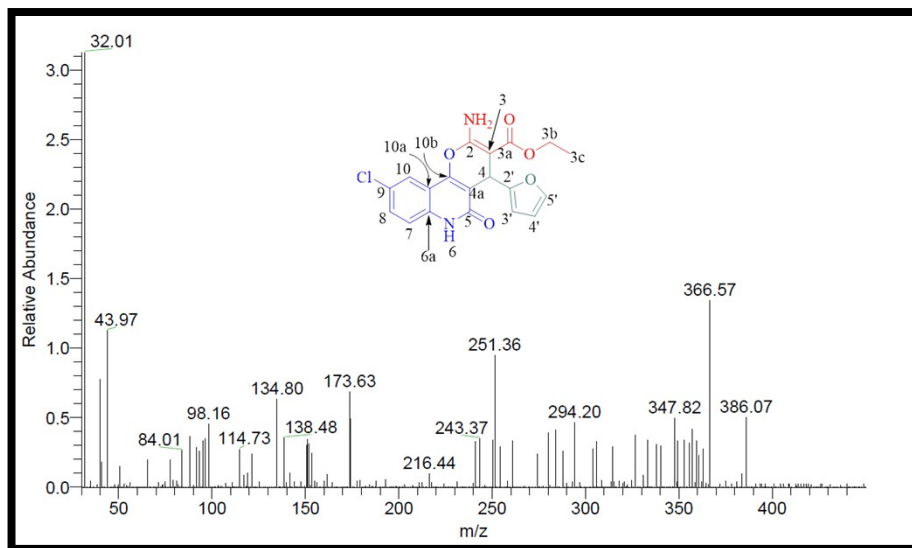

SI Figure 23. Mass spectrum of compound **3f**

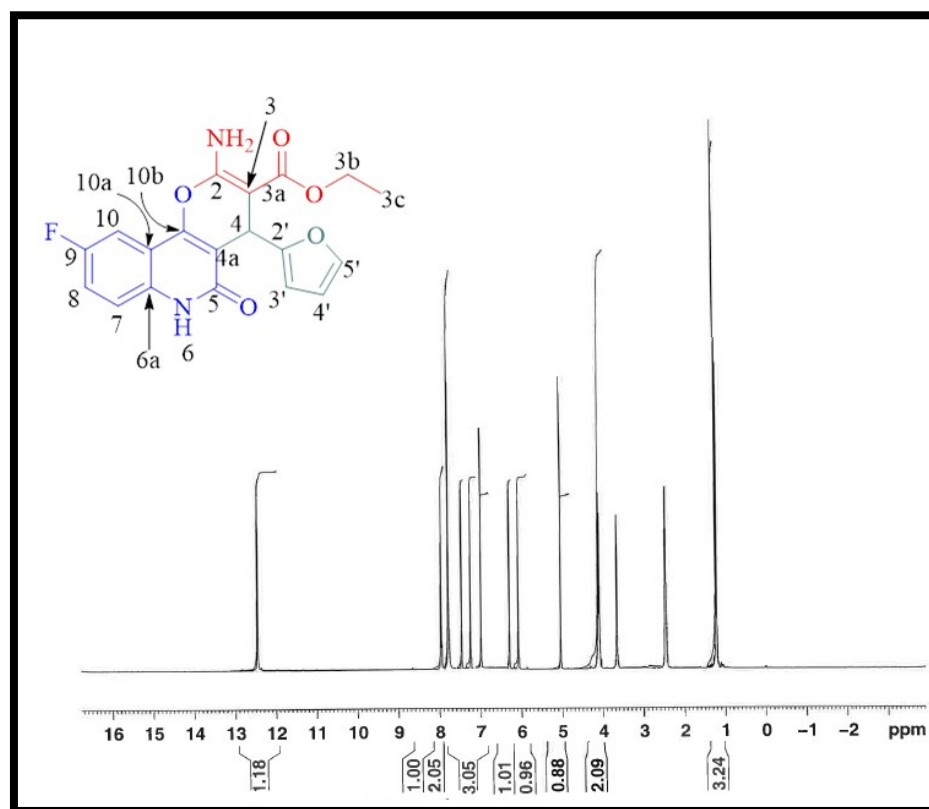

SI Figure 24. <sup>1</sup>H NMR spectrum of compound **3g**

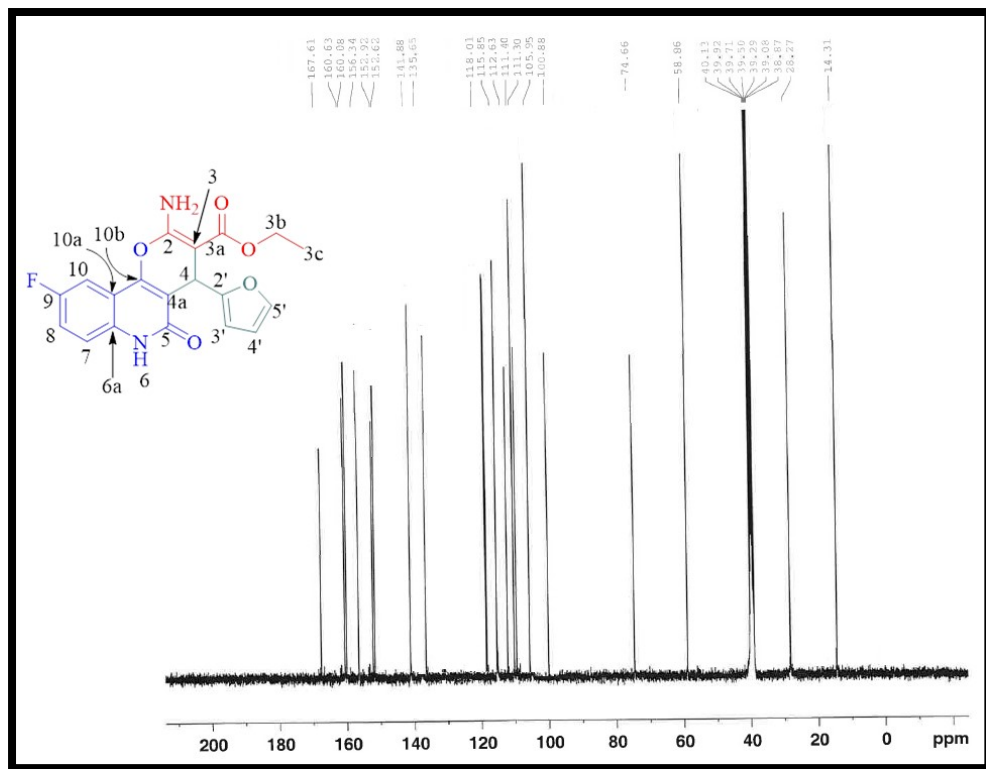

SI Figure 25.  $^{13}\text{C}$  NMR spectrum of compound 3g

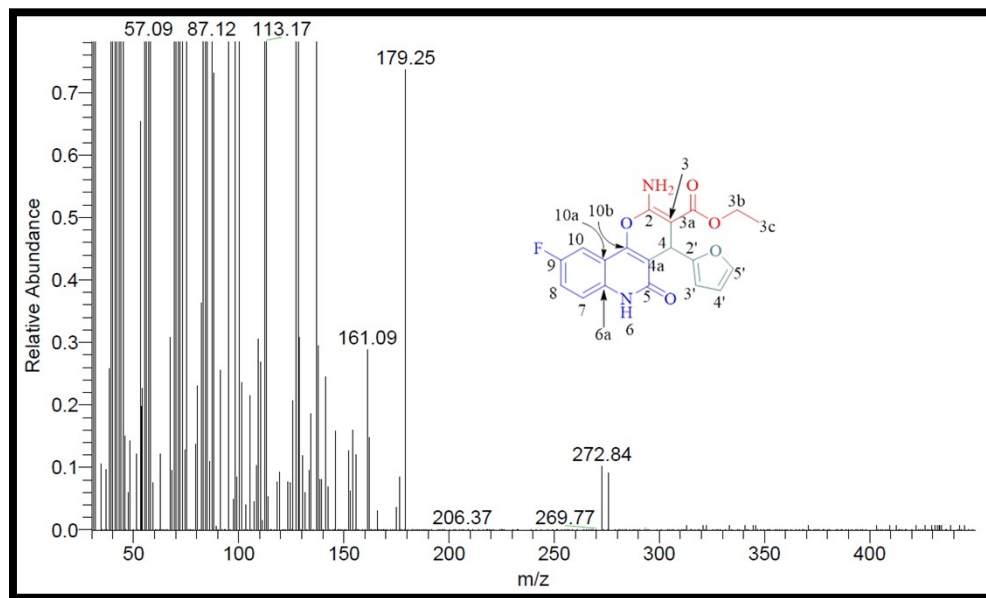

SI Figure 26. Mass spectrum of compound 3g

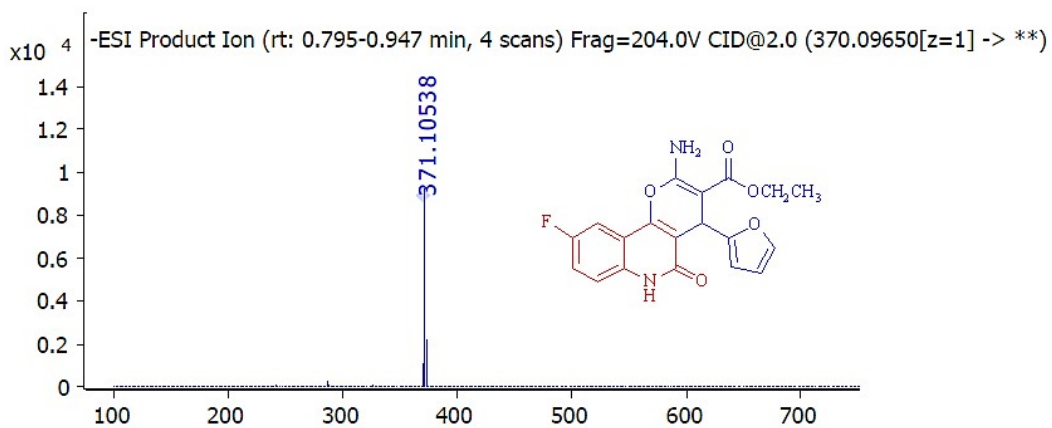

SI Figure 27. HRMS spectroscopy of compound 3g

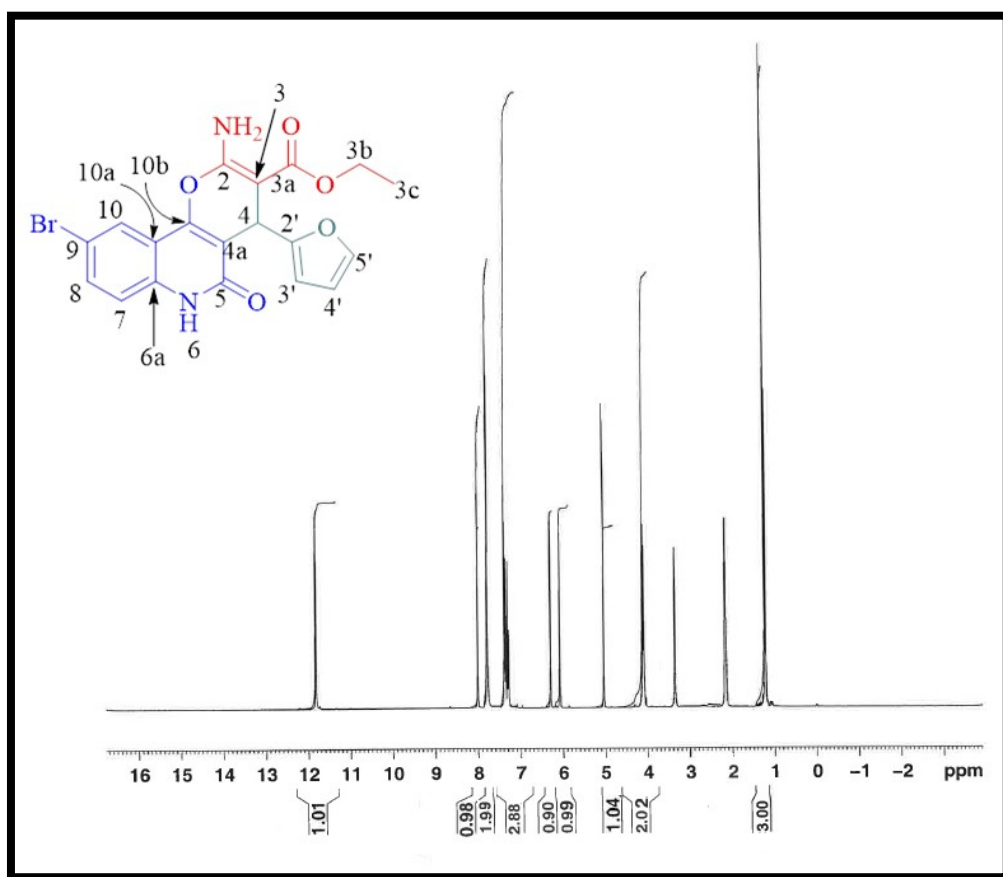

SI Figure 28. <sup>1</sup>H NMR spectrum of compound 3h

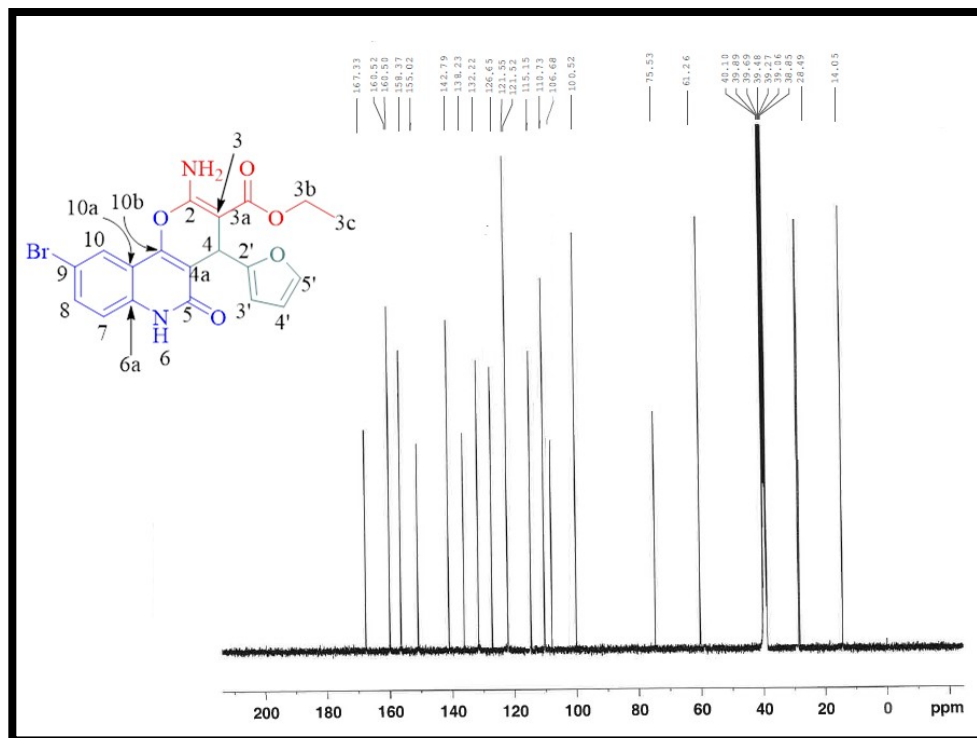

SI Figure 29.  $^{13}\text{C}$  NMR spectrum of compound 3h

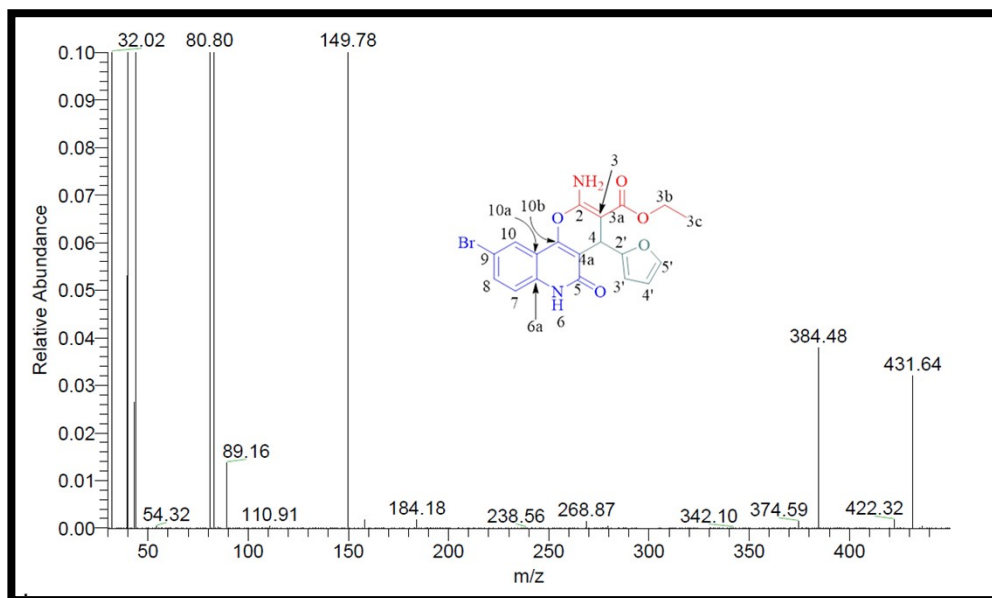

SI Figure 30. Mass spectrum of compound 3h



## Docking study

| Compound | Topo II | Binding interactions with Topo II | DNA gyrase | Binding interactions with DNA Gyrase |
|----------|---------|-----------------------------------|------------|--------------------------------------|
| 3a       | -7.63   |                                   | -8.14      |                                      |
| 3b       | -7.72   |                                   | -8.27      |                                      |
| 3c       | -8.01   |                                   | -8.26      |                                      |

|    |       |                                                                                     |       |                                                                                      |
|----|-------|-------------------------------------------------------------------------------------|-------|--------------------------------------------------------------------------------------|
| 3d | -7.90 | 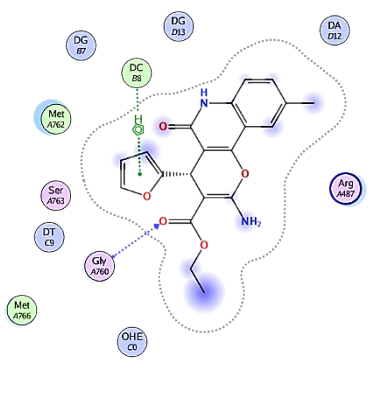   | -8.55 |    |
| 3e | -8.19 |   | -8.31 |   |
| 3f | -7.96 |  | -8.45 |  |
| 3g | -7.55 |  | -8.25 |  |

|                                      |                          |                                                                                     |                         |                                                                                      |
|--------------------------------------|--------------------------|-------------------------------------------------------------------------------------|-------------------------|--------------------------------------------------------------------------------------|
| <p><b>3h</b></p>                     | <p>-7.80</p>             | 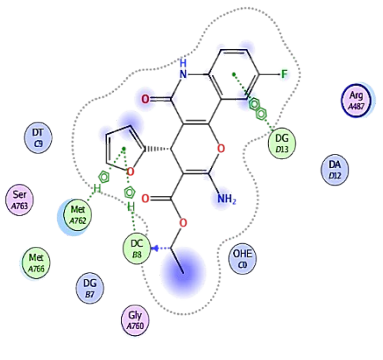   | <p>-8.03</p>            |    |
| <p><b>3i</b></p>                     | <p>-7.82</p>             |    | <p>-8.63</p>            |    |
| <p><b>Co-crystallized ligand</b></p> | <p>-11.02<br/>(0.35)</p> |  | <p>-9.92<br/>(0.64)</p> |  |

## X-Ray Crystal Structure Determinations of **3a** and **3b**

The single-crystal X-ray diffraction study were carried out on a Rigaku XtaLAB Synergy R diffractometer with HyPix-Arc 100 detector at 120(2) K (using Cu-K $\alpha$  radiation ( $\lambda$  = 1.54178 Å, PhotonJet R rotating anode generator). Dual space methods (SHELXT) [G. M. Sheldrick, *Acta Crystallogr.* 2015, **A71**, 3-8] were used for structure solution and refinement was carried out using SHELXL-2014 (full-matrix least-squares on  $F^2$ ) [G. M. Sheldrick, *Acta Crystallogr.* 2015, **C71**, 3-8]. Hydrogen atoms were localized by difference electron density determination and refined using a riding model (H(N) free). Semi-empirical absorption corrections were applied. In **3b** one furan-2-yl moiety was disordered (see cif-file for details). **3b** was refined as a 2-component twin (see cif-file for details).

**3a - SB1526\_HY**: orange crystals, C<sub>19</sub>H<sub>16</sub>N<sub>2</sub>O<sub>5</sub>,  $M_r$  = 352.34, crystal size 0.10 × 0.08 × 0.04 mm, triclinic, space group *P-1* (No. 2),  $a$  = 8.2266(2) Å,  $b$  = 8.5847(3) Å,  $c$  = 12.5866(3) Å,  $\alpha$  = 106.141(3)°,  $\beta$  = 103.673(2)°,  $\gamma$  = 100.320(2)°,  $V$  = 800.60(4) Å<sup>3</sup>,  $Z$  = 2,  $\rho$  = 1.462 Mg/m<sup>3</sup>,  $\mu$ (Cu-K $\alpha$ ) = 0.90 mm<sup>-1</sup>,  $F(000)$  = 368,  $T$  = 120(2) K,  $2\theta_{\max}$  = 158.6°, 17010 reflections, of which 3430 were independent ( $R_{\text{int}}$  = 0.024), 244 parameters, 3 restraints,  $R_1$  = 0.039 (for 3087  $I > 2\sigma(I)$ ),  $wR_2$  = 0.116 (all data),  $S$  = 1.07, largest diff. peak / hole = 0.34 / -0.26 e Å<sup>-3</sup>.

**3b – SB1525\_HY**: orange crystals, C<sub>20</sub>H<sub>18</sub>N<sub>2</sub>O<sub>5</sub>,  $M_r$  = 366.36, crystal size 0.14 × 0.10 × 0.03 mm, triclinic, space group *P-1* (No. 2),  $a$  = 7.9731(2) Å,  $b$  = 8.1795(2) Å,  $c$  = 28.7599(7) Å,  $\alpha$  = 91.662(2)°,  $\beta$  = 90.972(2)°,  $\gamma$  = 115.979(2)°,  $V$  = 1684.45(8) Å<sup>3</sup>,  $Z$  = 4,  $\rho$  = 1.445 Mg/m<sup>3</sup>,  $\mu$ (Cu-K $\alpha$ ) = 0.87 mm<sup>-1</sup>,  $F(000)$  = 768,  $T$  = 120(2) K,  $2\theta_{\max}$  = 158.4°, 9888 independent reflection ( $R_{\text{int}}$  = 0.000, using a HKLF 5 file due to twin refinement), 495 parameters, 34 restraints,  $R_1$  = 0.051 (for 8552  $I > 2\sigma(I)$ ),  $wR_2$  = 0.142 (all data),  $S$  = 1.06, largest diff. peak / hole = 0.30 / -0.30 e Å<sup>-3</sup>

CCDC 2312660 (**3a – SB1526\_HY**) and 2312661 (**3b – SB1525\_HY**) contain the supplementary crystallographic data for this paper. These data can be obtained free of charge from The Cambridge Crystallographic Data Centre via [www.ccdc.cam.ac.uk/data\\_request/cif](http://www.ccdc.cam.ac.uk/data_request/cif).

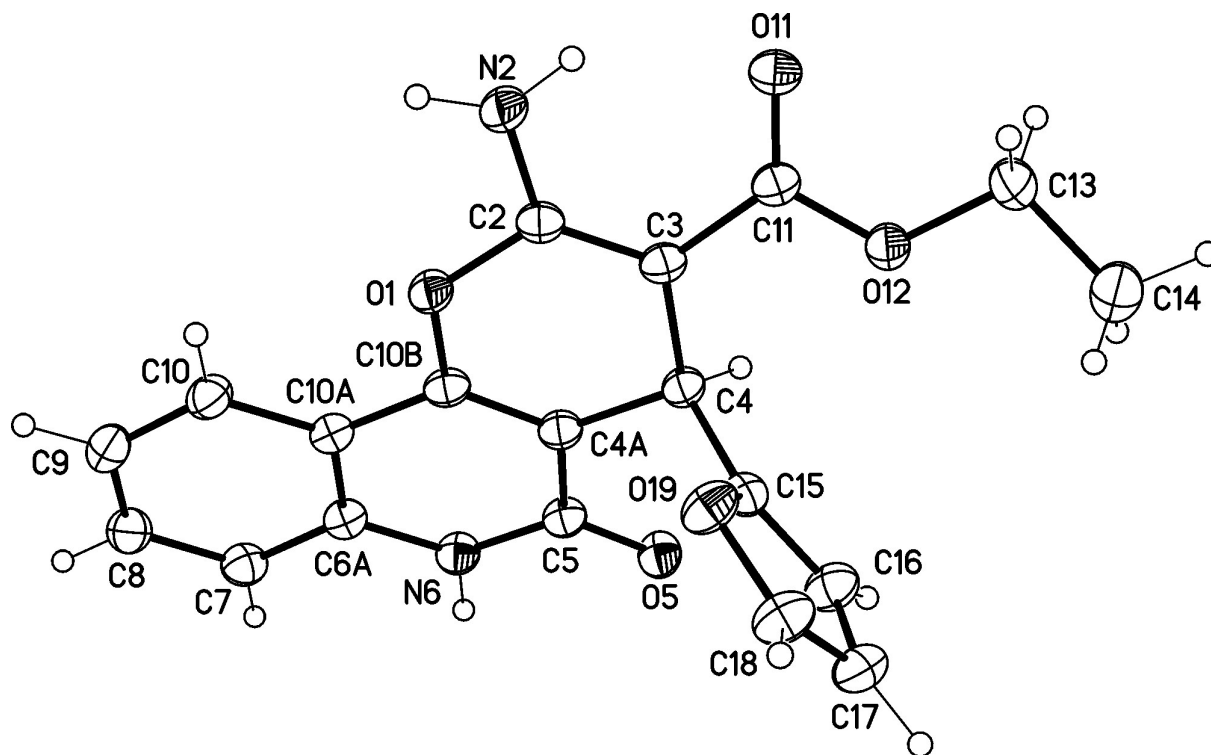

**Fig. 31x.** Molecular structure of **3a – SB1526\_HY** (displacement parameters are drawn at 50 % probability level).

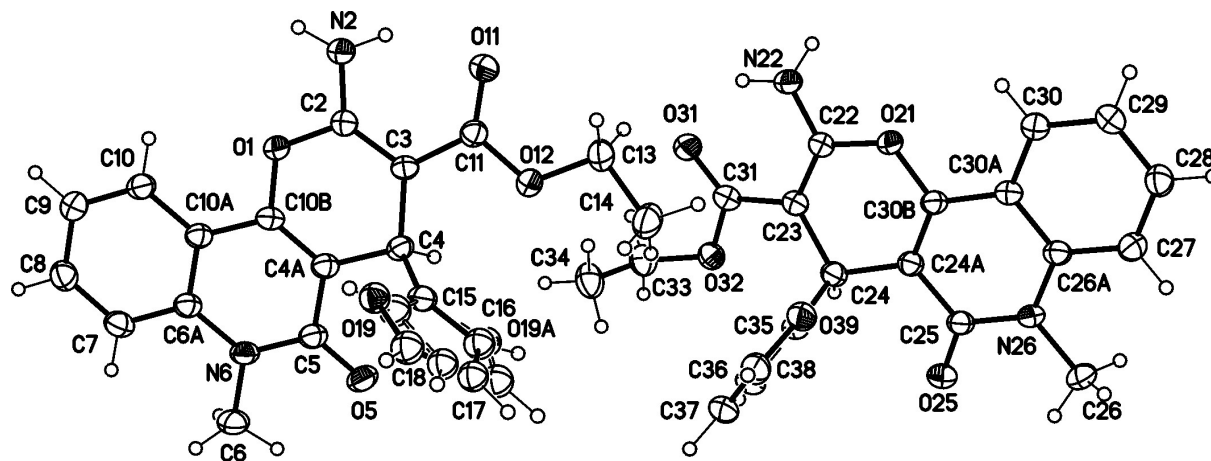

**Fig. 32x.** Molecular structure (asymmetric unit) of **3b – SB1525\_HY** (displacement parameters are drawn at 50 % probability level).

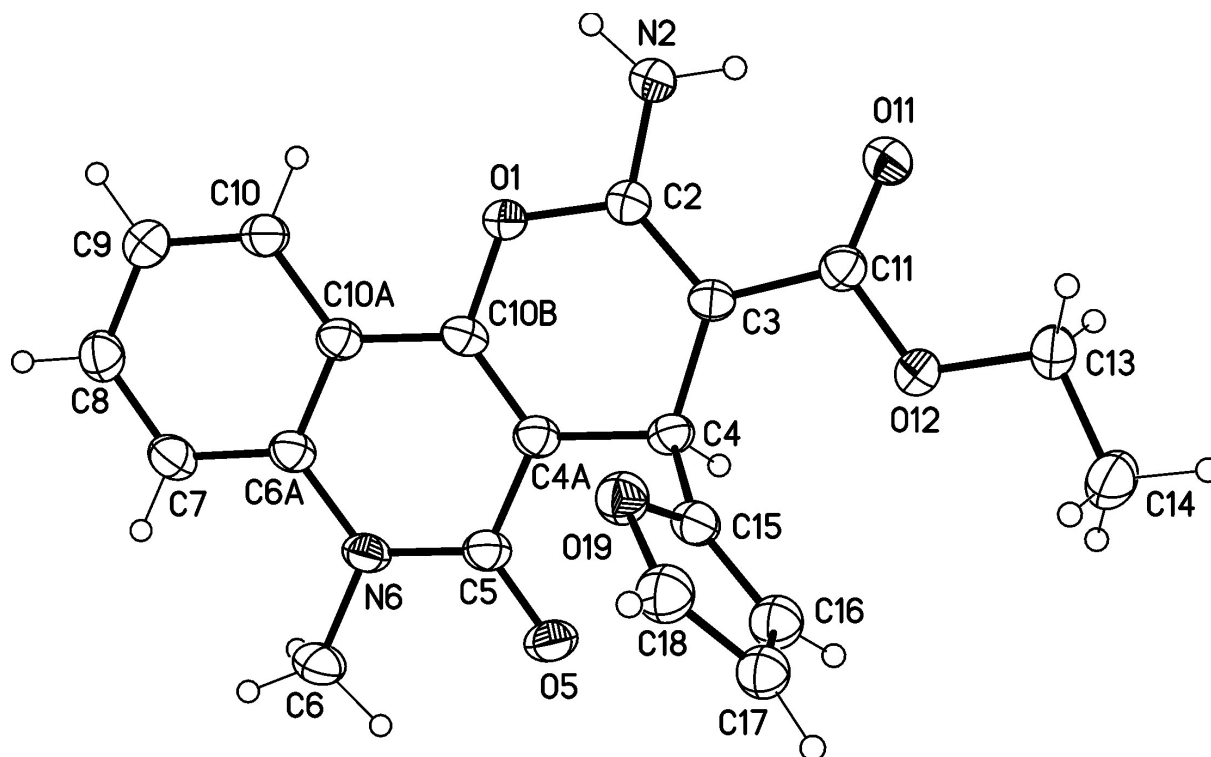

**Fig. 33x.** 1<sup>st</sup> crystallographic independent molecule of **3b** – **SB1525\_HY** (displacement parameters are drawn at 50 % probability level).

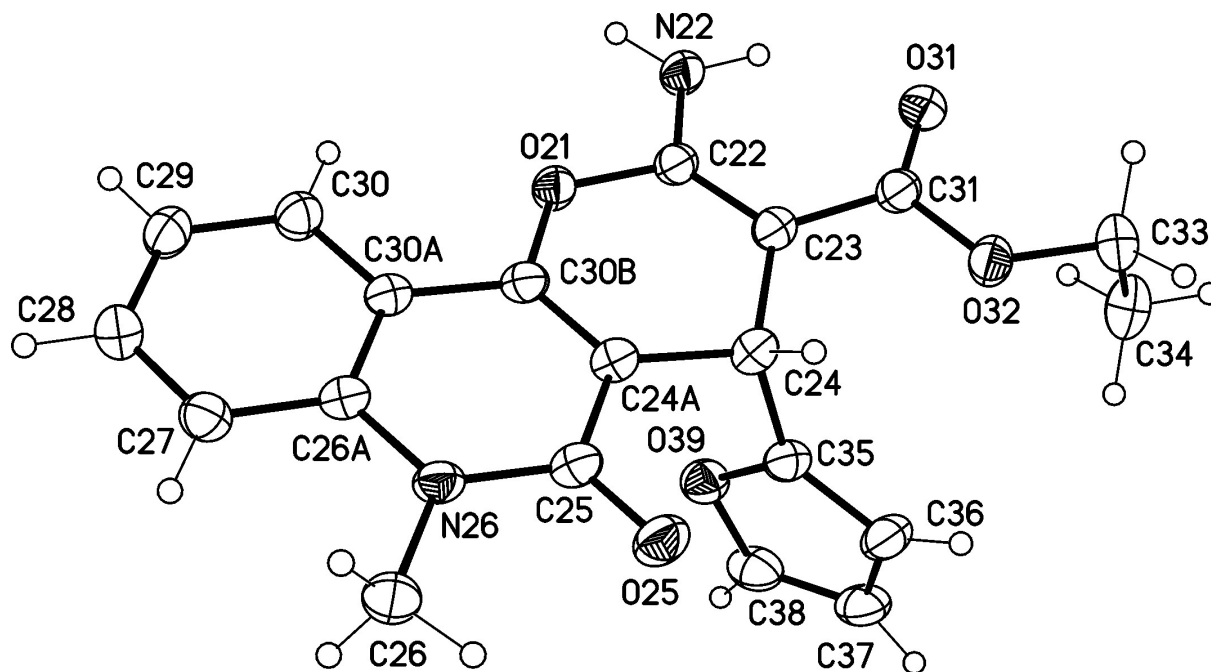

**Fig. 34x.** 2<sup>nd</sup> crystallographic independent molecule of **3b** – **SB1525\_HY** (displacement parameters are drawn at 50 % probability level).
